# Supplementary material
Source: MDPI journal article supplement (https://www.mdpi.com/2225-1154/9/12/177)
Supplement: s1 [file s1]

Archive with 2 entries (2 files):
- TableS1_ClimateScenarios_SECR.pdf
- TableS2_White-talied_Ptarmigan_NorthernColoradoRange_SSA.pdf
